# Supplementary material for: Controlling network morphology in hybrid radical/cationic photopolymerized systems
Source: Royal Society of Chemistry journal article supplement (doi:10.1039/d2py01288j), 2022-11-29
Supplement: d2py01288j1.pdf [file d2py01288j1.pdf]

## **Supplementary Information: Controlling Network Morphology in Hybrid Radical/Cationic Photopolymerized Systems**

Tanner L. Grover<sup>a</sup> and C. Allan Guymon<sup>a,\*</sup>

<sup>a</sup>Department of Chemical and Biochemical Engineering, University of Iowa, 4133 Seamans Center, Iowa City, IA 52242, USA

\*Corresponding Author: [allan-guymon@uiowa.edu](mailto:allan-guymon@uiowa.edu)

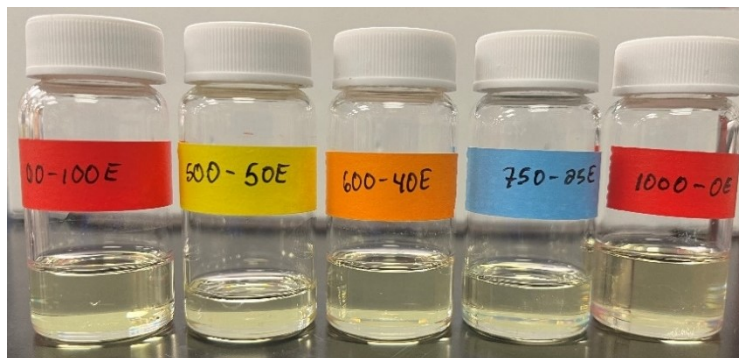

**Figure S.1.** Digital image of hybrid formulations prior to photopolymerization. Before photopolymerization, all formulations are miscible with no visible signs of phase separation.

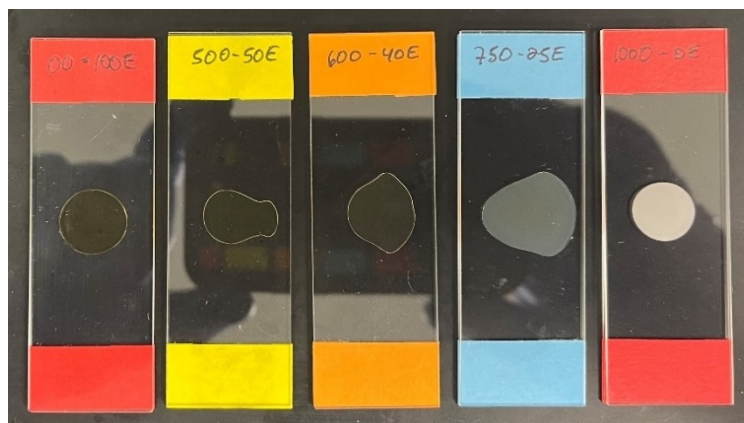

**Figure S.2.** Digital image of hybrid formulations post photopolymerization and before any thermal postcure in glass molds. After photopolymerization, solidified glassy films display greater opacity with increasing EHOX concentration. The observed opacity indicates that phase separation occurs during photopolymerization.

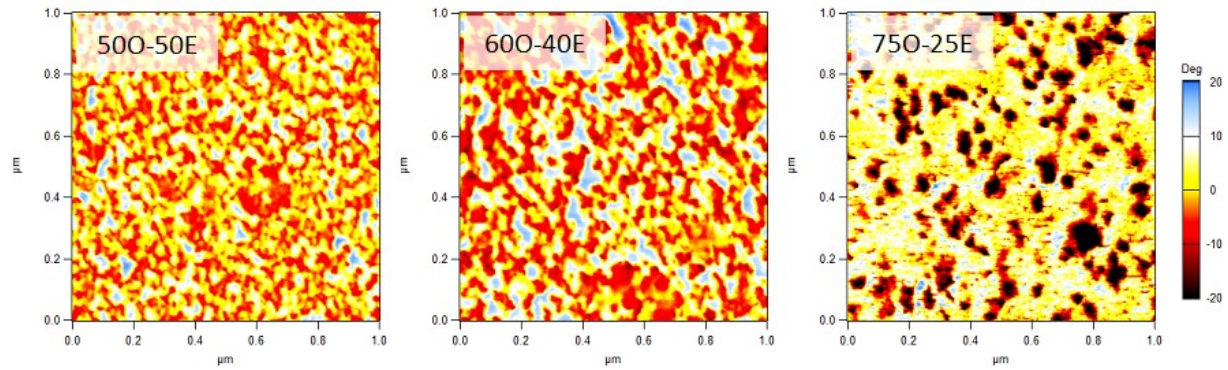

**Figure S.3.** AFM phase images of hybrid materials after photopolymerization with no thermal post curing. At a high EHOX/EEC ratio, e.g., 750-25E, phase separation after only photocuring is clearly visible given by the relatively large, localized regions of considerably different phase angles. By decreasing EHOX concentration, the size scale of phase separation and contrast in phase angle is reduced accordingly.
